# Supplementary material for: Transplanted Mouse Embryonic Stem Cell–Derived Retinal Ganglion Cells Integrate and Form Synapses in a Retinal Ganglion Cell-Depleted Mouse Model
Source: PubMed Central journal article supplement — Invest Ophthalmol Vis Sci. 2021 Oct 27;62(13):26. doi: 10.1167/iovs.62.13.26 (PMC8556558; doi:10.1167/iovs.62.13.26), 2021-10-27
Supplement: iovs-62-13-26_s001.pdf [file iovs-62-13-26_s001.pdf]

Negative control  
(7-AAD(-),DD7 EBs)

Graft  
(7-AAD(+),DD14 excised OVs)

Debris exclusion

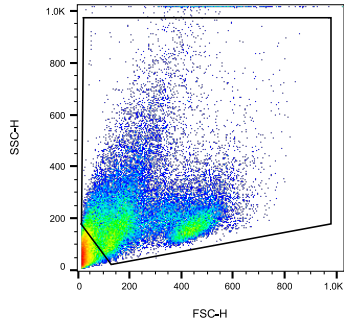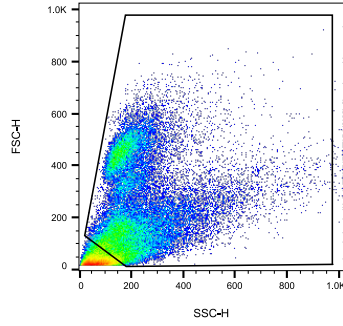

Single cells

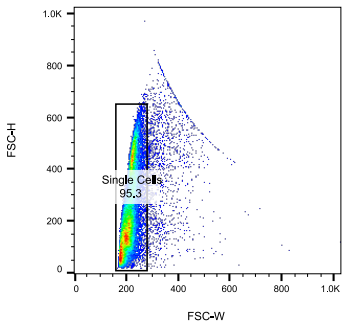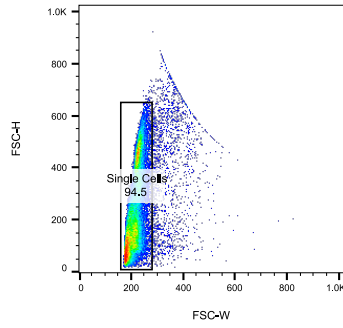

Live cells

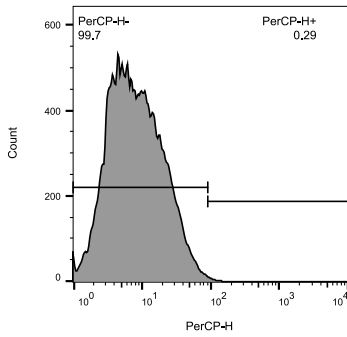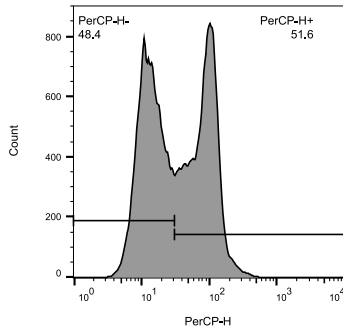

THY1-EGFP+ cells

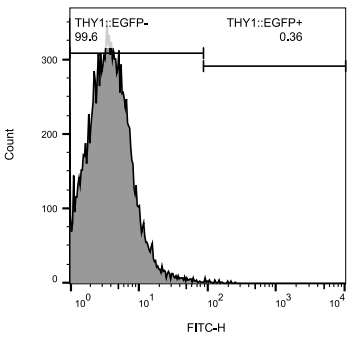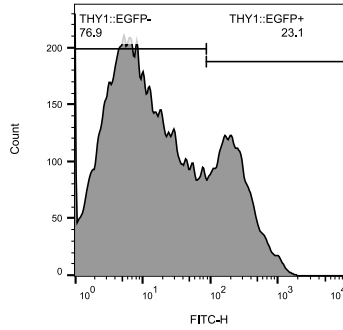

**Supplementary Figure 1.** The sequential gating or sorting strategies for flow cytometry. 7-AAD, 7-Amino-Actinomycin D. DD, differentiated day. EBs, embryoid bodies. OVs, optic vesicles.
