# Supplementary material for: Transplanted Mouse Embryonic Stem Cell–Derived Retinal Ganglion Cells Integrate and Form Synapses in a Retinal Ganglion Cell-Depleted Mouse Model
Source: PubMed Central journal article supplement — Invest Ophthalmol Vis Sci. 2021 Oct 27;62(13):26. doi: 10.1167/iovs.62.13.26 (PMC8556558; doi:10.1167/iovs.62.13.26), 2021-10-27
Supplement: iovs-62-13-26_s002.pdf [file iovs-62-13-26_s002.pdf]

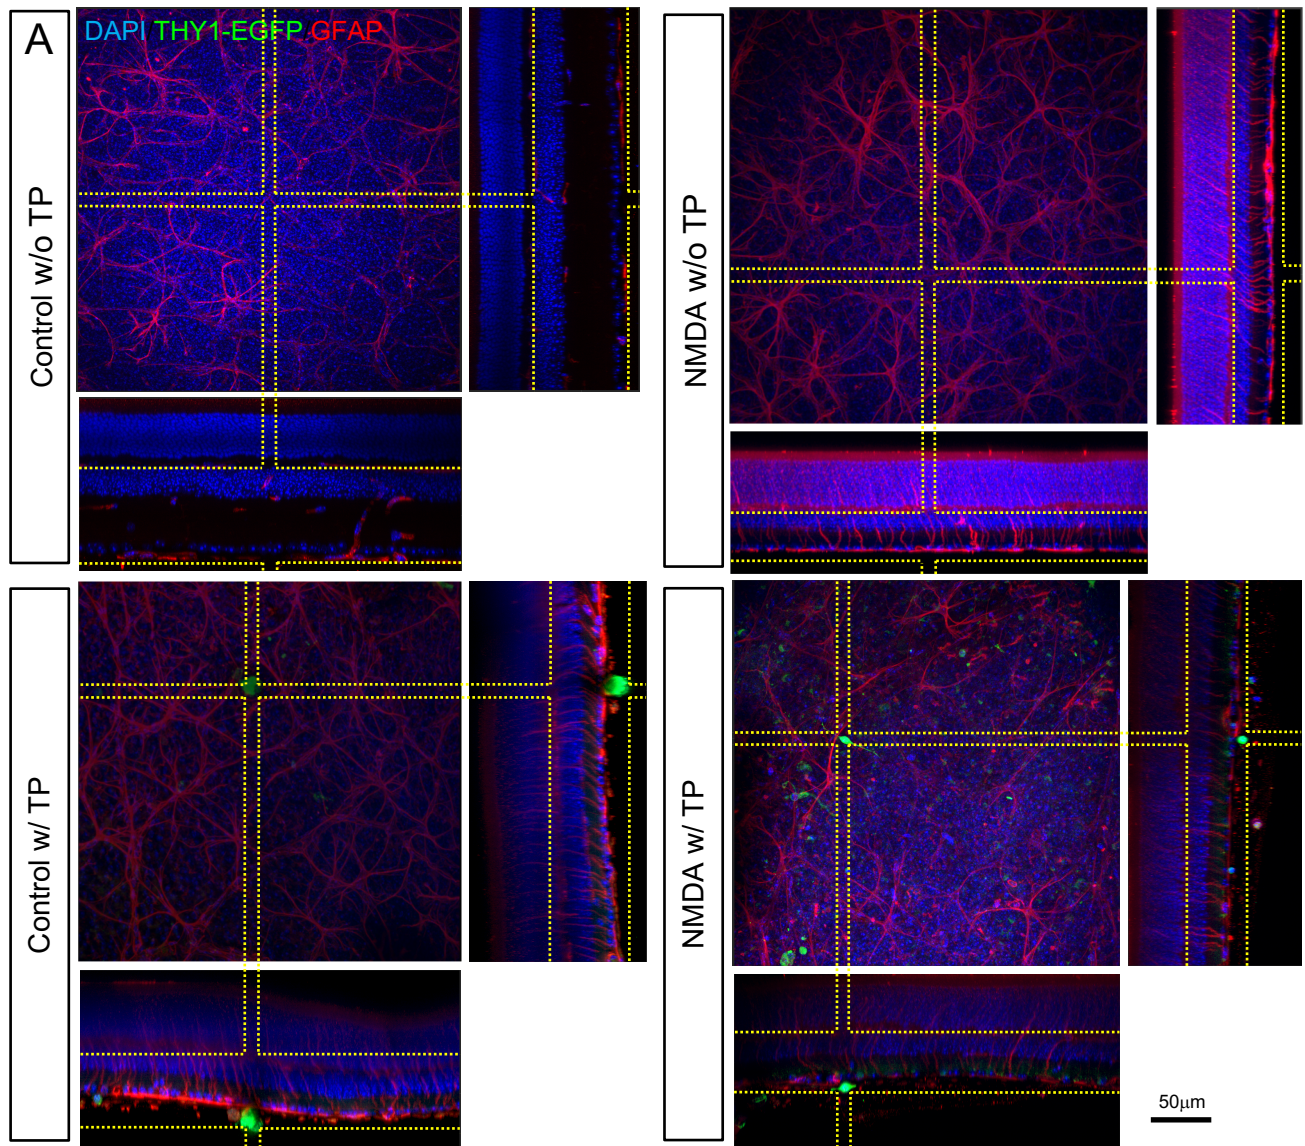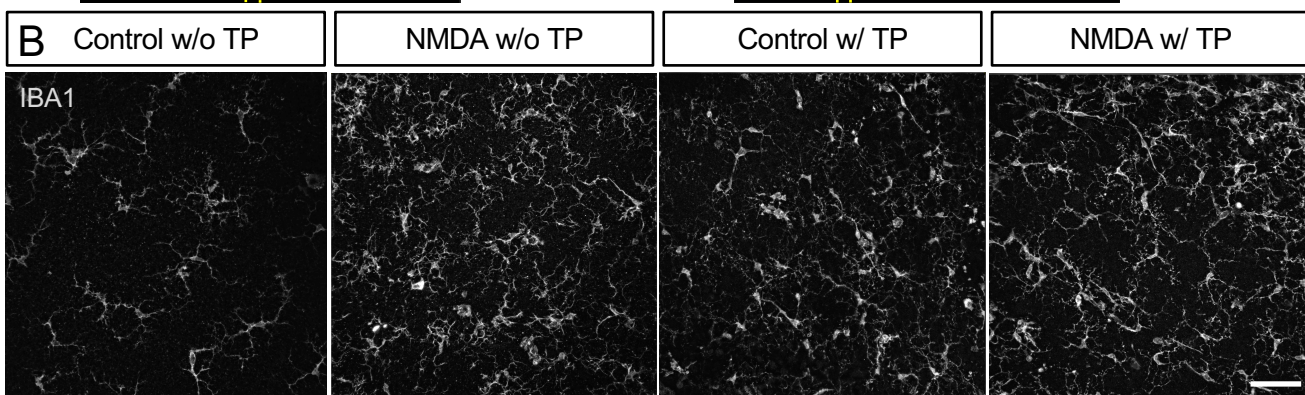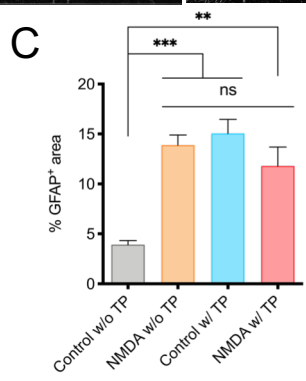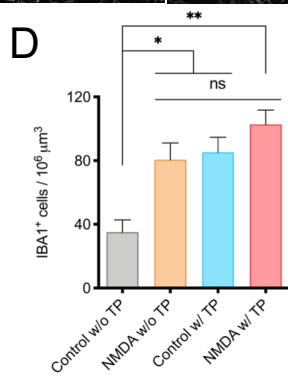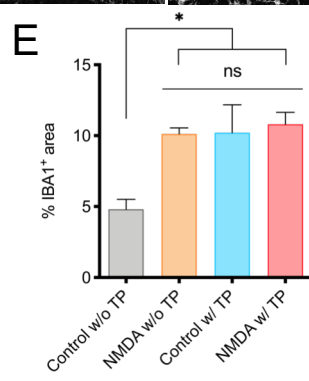

**Supplementary Figure S2.** Immunoreactivity of GFAP and IBA1 in the retina after transplantation.

(A) Representative images of the retina showing GFAP-positive Müller cells and astrocytes in the retina at 1 week after NMDA treatment or/and transplantation. Scale bar: 50  $\mu\text{m}$ .

(B) Representative images of the retina showing IBA1-positive microglia in the retina at 1 week after NMDA treatment or/and transplantation. Scale bar: 50  $\mu\text{m}$ .

(C-E) Quantification of the ratio of GFAP<sup>+</sup> area per sectional views (C), IBA1-positive cells (D), and the ratio of IBA1<sup>+</sup> area per 318  $\mu\text{m}$ \*318  $\mu\text{m}$  retina area (E) at 1 week after NMDA treatment or/and transplantation. GFAP, glial fibrillary acidic protein; IBA1, ionized calcium-binding adapter molecule 1. TP, transplantation; w/, with; w/o, without. n = 3 retinas. Values are shown as mean  $\pm$  SEM. One-way ANOVA followed by Tukey's test, for statistics. \*p < 0.05; \*\*p < 0.01; \*\*\*p < 0.001; ns, not significant.
