# Supplementary material for: Transplanted Mouse Embryonic Stem Cell–Derived Retinal Ganglion Cells Integrate and Form Synapses in a Retinal Ganglion Cell-Depleted Mouse Model
Source: PubMed Central journal article supplement — Invest Ophthalmol Vis Sci. 2021 Oct 27;62(13):26. doi: 10.1167/iovs.62.13.26 (PMC8556558; doi:10.1167/iovs.62.13.26), 2021-10-27
Supplement: iovs-62-13-26_s003.pdf [file iovs-62-13-26_s003.pdf]

**A**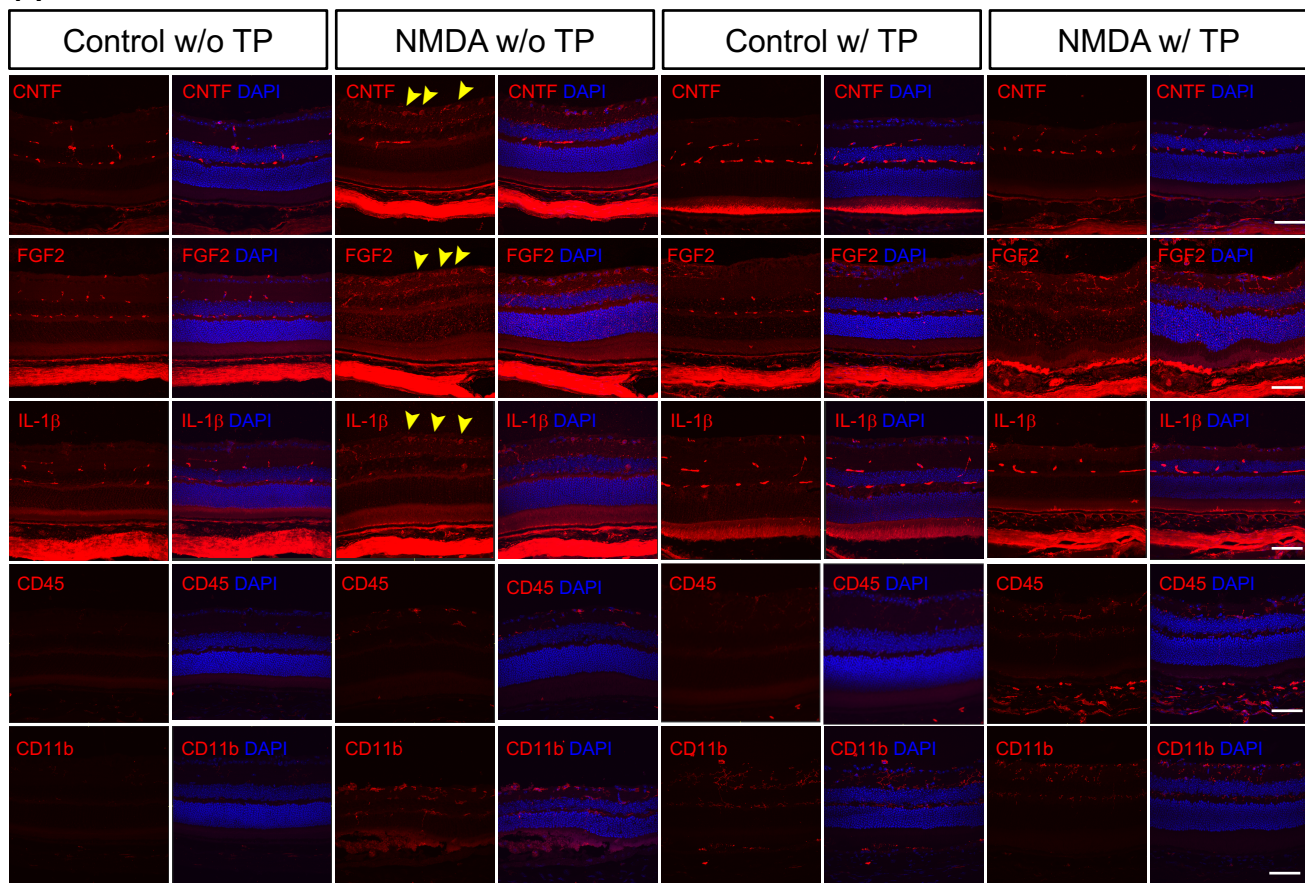**B**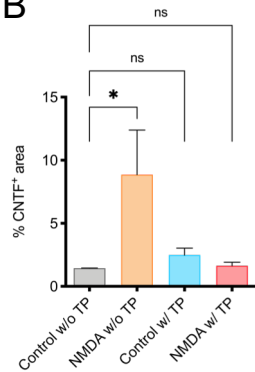**C**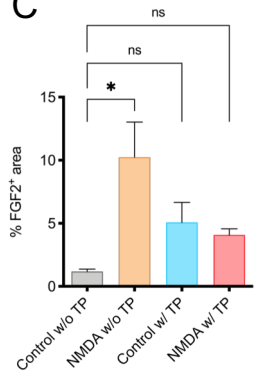**D**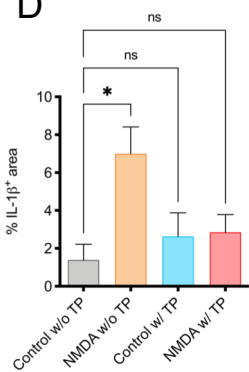**E**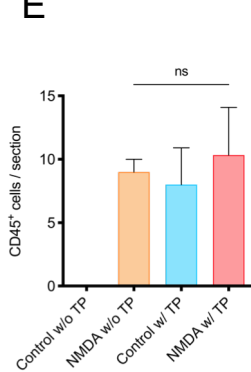**F**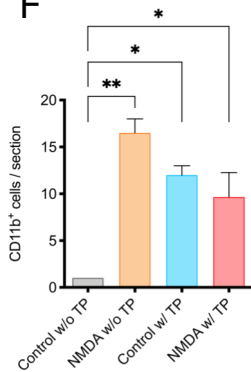

**Supplementary Figure S3.** Alternation of inflammatory cytokines and leukocytes in the retina after transplantation.

(A) Representative images of retinal cross-sections showing inflammatory/protective cytokines (CNTF, FGF2 and IL-1 $\beta$ , yellow arrows), CD45-positive and CD11b-positive macrophage/microglia in the retina at 1 week after NMDA treatment or/and transplantation. Scale bar: 60  $\mu$ m. (B-F) Quantification of the ratio of CNTF-positive area per retinal cross-section (B), FGF2-positive area per retinal cross-section (C), IL-1 $\beta$ -positive area per retinal cross-section (D), CD45-positive cells per retinal cross-section (E), and CD11b-positive cells per retinal cross-section (F), at 1 week after NMDA treatment or/and transplantation. CNTF, ciliary neurotrophic factor. TNF $\alpha$ , Tumor Necrosis Factor-Alpha. FGF2, Fibroblast Growth Factor 2. IL-1 $\beta$ , interleukin 1 beta. IL-6, interleukin 6. TP, transplantation; w/, with; w/o, without. n = 2 or 3 retinas. Values are shown as mean  $\pm$  SEM. One-way ANOVA followed by Tukey's test, for statistics. \*p < 0.05; \*\*p < 0.01; ns, not significant.
